# Supplementary material for: Blood Composite Scores in Patients with Systemic Lupus Erythematosus
Source: MDPI journal article supplement (doi:10.3390/biomedicines11102782), 2023-10-13
Supplement: s1 [file s1]

**Supplementary Table S1.** Relationship of SLICC score items to blood composite scores

1

|                                               |    |    | SIRI                |       | NLR                 |       | MLR                 |      | PLR                    |              |
|-----------------------------------------------|----|----|---------------------|-------|---------------------|-------|---------------------|------|------------------------|--------------|
|                                               | n  | %  | beta coef. (95%). p |       | beta coef. (95%). p |       | beta coef. (95%). p |      | beta coef. (95%). p    |              |
| Ocular                                        |    |    |                     |       |                     |       |                     |      |                        |              |
| Any cataract ever                             | 29 | 11 | 0.4 (-0.02-0.8)     | 0.061 | 0.4 (-0.2-1)        | 0.18  | 0.06 (-0.03-0.2)    | 0.18 | 4 (-34-42)             | 0.83         |
| Retinal change or optic atrophy               | 33 | 12 | 0.2 (-0.2-0.6)      | 0.34  | 0.09 (-1-1)         | 0.78  | 0.02 (-0.07-0.1)    | 0.65 | -23 (-60-15)           | 0.24         |
| Points =>1 in the domain                      | 63 | 22 | 0.1 (-0.2-0.4)      | 0.56  | 0.06 (-0.4-1)       | 0.79  | 0.0002 (-0.07-0.07) | 0.99 | -8 (-37-20)            | 0.57         |
| Neuropsychiatric                              |    |    |                     |       |                     |       |                     |      |                        |              |
| Cognitive impairment                          | 7  | 3  | -0.05 (-0.9-0.8)    | 0.90  | -0.4 (-2-1)         | 0.53  | -0.03 (-0.2-0.1)    | 0.71 | -58 (-133-16)          | 0.12         |
| Seizures requiring therapy for 6 months       | 15 | 5  | 0.5 (-0.1-1)        | 0.11  | 1 (-0.02-2)         | 0.057 | 0.1 (-0.02-0.2)     | 0.11 | -42 (-97-13)           | 0.13         |
| Cerebrovascular accident ever                 | 13 | 5  | -0.2 (-1-0.4)       | 0.60  | -0.03 (-1-1)        | 0.95  | -0.07 (-0.2-0.05)   | 0.95 | -24 (-75-28)           | 0.95         |
| Cranial or peripheral neuropathy              | 5  | 2  | -0.4 (-2-1)         | 0.55  | -0.4 (-2-1)         | 0.66  | -0.04 (-0.3-0.2)    | 0.77 | -31 (-144-82)          | 0.59         |
| Transverse myelitis                           | 1  | 0  | -0.1 (-2-2)         | 0.90  | -1 (-4-2)           | 0.64  | -0.1 (-1-0.4)       | 0.69 | -91 (-286-103)         | 0.36         |
| Points =>1 in the domain                      | 40 | 14 | 0.02 (-0.4-0.4)     | 0.91  | 0.07 (-0.5-1)       | 0.80  | 0.002 (-0.08-0.08)  | 0.97 | <b>-47 (-81-(-12))</b> | <b>0.008</b> |
| Renal                                         |    |    |                     |       |                     |       |                     |      |                        |              |
| Estimated or glomerular filtration rate <50%  | 13 | 5  | 0.08 (-0.6-1)       | 0.80  | -0.3 (-1-1)         | 0.46  | 0.02 (-0.1-0.1)     | 0.82 | -24 (-82-33)           | 0.41         |
| Proteinuria 3.5 gm/24 hours                   | 7  | 3  | 0.3 (-0.5-1)        | 0.49  | -0.1 (-1-1)         | 0.82  | -0.04 (-0.2-0.1)    | 0.63 | -41 (-116-34)          | 0.29         |
| End-stage renal disease                       | 4  | 1  | 0.1 (-0.2-0.5)      | 0.50  | -0.2 (-1-0.3)       | 0.42  | 0.004 (-0.07-0.08)  | 0.92 | -18 (-51-15)           | 0.28         |
| Points =>1 in the domain                      | 28 | 10 | 0.1 (-0.3-1)        | 0.67  | -0.2 (-1-0.4)       | 0.55  | -0.005 (-0.1-0.09)  | 0.92 | -25 (-64-14)           | 0.21         |
| Pulmonary                                     |    |    |                     |       |                     |       |                     |      |                        |              |
| Pulmonary hypertension                        | 4  | 1  | -0.2 (-1-1)         | 0.80  | 1 (-1-2)            | 0.56  | 0.2 (-0.08-0.4)     | 0.17 | 87 (-22-195)           | 0.12         |
| Pulmonary fibrosis                            | 4  | 1  | 1 (-0.5-2)          | 0.26  | -0.4 (-2-1)         | 0.64  | 0.2 (-0.07-0.4)     | 0.19 | -11 (-106-84)          | 0.82         |
| Shrinking lung                                | 2  | 1  | -0.4 (-2-1)         | 0.62  | -1 (-3-2)           | 0.60  | -0.03 (-0.3-0.3)    | 0.87 | -35 (-168-98)          | 0.61         |
| Pleural fibrosis                              | 1  | 0  | 0.1 (-2-2)          | 0.94  | -0.2 (-3-3)         | 0.92  | -0.06 (-1-0.4)      | 0.78 | -82 (-270-107)         | 0.29         |
| Pulmonary infarction                          | 1  | 0  | -1 (-3-1)           | 0.45  | -1 (-4-2)           | 0.43  | -0.2 (-1-0.3)       | 0.48 | -41 (-227-145)         | 0.66         |
| Points =>1 in the domain                      | 19 | 7  | -0.1 (-1-0.4)       | 0.68  | -0.3 (-1-0.5)       | 0.43  | 0.05 (-0.06-0.2)    | 0.40 | 7 (-41-56)             | 0.77         |
| Cardiovascular                                |    |    |                     |       |                     |       |                     |      |                        |              |
| Angina or coronary artery bypass              | 4  | 1  | 0.2 (-1-1)          | 0.74  | 0.4 (-1-2)          | 0.59  | 0.04 (-0.2-0.3)     | 0.70 | -31 (-129-68)          | 0.54         |
| Myocardial infarction ever                    | 2  | 1  | 0.3 (-1-2)          | 0.67  | -0.03 (-2-2)        | 0.98  | 0.05 (-0.4-0.3)     | 0.77 | -78 (-216-60)          | 0.27         |
| Cardiomyopathy                                | 2  | 1  | -0.4 (-3-2)         | 0.69  | -0.3 (-3-3)         | 0.84  | 0.3 (-0.2-1)        | 0.23 | <b>260 (67-453)</b>    | <b>0.008</b> |
| Valvular disease                              | 9  | 3  | 0.001 (-1-1)        | 0.99  | -0.01 (-1-1)        | 0.98  | 0.04 (-0.1-0.2)     | 0.68 | -4 (-85-77)            | 0.92         |
| Pericarditis for 6 months, or pericardiectomy | 2  | 1  | 1 (-0.5-3)          | 0.17  | 0.3 (-2-2)          | 0.82  | 0.2 (-0.1-1)        | 0.18 | 18 (-120-156)          | 0.80         |

|                                                                                        |    |    |                  |              |                   |              |                       |                  |                   |              |
|----------------------------------------------------------------------------------------|----|----|------------------|--------------|-------------------|--------------|-----------------------|------------------|-------------------|--------------|
| <i>Points =&gt;1 in the domain</i>                                                     | 23 | 8  | -0.03 (-1-0.5)   | 0.90         | -0.07 (-1-1)      | 0.86         | 0.06 (-0.05-0.2)      | 0.32             | 0.3 (-47-48)      | 0.99         |
| Peripheral vascular                                                                    |    |    |                  |              |                   |              |                       |                  |                   |              |
| Claudication for 6 months                                                              | 3  | 1  | 0.1 (-1-1)       | 0.82         | 0.3 (-1-2)        | 0.73         | -0.1 (-0.4-0.2)       | 0.49             | -31 (-145-83)     | 0.59         |
| Minor tissue loss (pulp space)                                                         | 5  | 2  | 0.1 (-1-1)       | 0.82         | -0.3 (-2-1)       | 0.68         | <b>0.3 (0.1-1)</b>    | <b>0.003</b>     | -11 (-110-88)     | 0.82         |
| Significant tissue loss ever                                                           | 0  | 0  | -                | -            | -                 | -            | -                     | -                | -                 | -            |
| Venous thrombosis                                                                      | 14 | 5  | -0.06 (-1-1)     | 0.85         | 0.1 (-1-1)        | 0.76         | <b>0.2 (0.04-0.3)</b> | <b>0.010</b>     | 24 (-34-82)       | 0.42         |
| <i>Points =&gt;1 in the domain</i>                                                     | 34 | 12 | 0.2 (-0.2-1)     | 0.38         | 0.3 (-0.3-1)      | 0.30         | <b>0.1 (0.02-0.2)</b> | <b>0.020</b>     | 13 (-24-50)       | 0.50         |
| Gastrointestinal                                                                       |    |    |                  |              |                   |              |                       |                  |                   |              |
| Infarction or resection of bowel                                                       | 22 | 8  | -0.1 (-0.6-0.4)  | 0.69         | -0.3 (-1-0.4)     | 0.36         | 0.04 (-0.06-0.1)      | 0.45             | -18 (-63-27)      | 0.42         |
| Mesenteric insufficiency                                                               | 1  | 0  | -0.3 (-2-2)      | 0.79         | 1 (-2-4)          | 0.54         | <b>1 (1-2)</b>        | <b>&lt;0.001</b> | -                 | -            |
| Infarction or resection of bowel below duodenum, spleen, liver, or chronic peritonitis | 1  | 0  | -0.4 (-3-2)      | 0.70         | -0.5 (-3-3)       | 0.75         | -0.1 (-1-0.4)         | 0.63             | -50 (-245-144)    | 0.61         |
| Stricture or upper gastrointestinal tract surgery ever                                 | 0  | 0  | -                | -            | -                 | -            | -                     | -                | -                 | -            |
| Pancreatic insufficiency                                                               | 0  | 0  | -                | -            | -                 | -            | -                     | -                | -                 | -            |
| <i>Points =&gt;1 in the domain</i>                                                     | 28 | 10 | -0.1 (-1-0.3)    | 0.56         | -0.3 (-1-0.3)     | 0.34         | 0.03 (-0.06-0.1)      | 0.51             | -19 (-59-21)      | 0.35         |
| Musculoskeletal                                                                        |    |    |                  |              |                   |              |                       |                  |                   |              |
| Muscle atrophy or weakness                                                             | 3  | 1  | <b>2 (1-3)</b>   | <b>0.002</b> | <b>2 (0.06-4)</b> | <b>0.043</b> | 0.1 (-0.2-0.4)        | 0.50             | -29 (-139-81)     | 0.6          |
| Deforming or erosive arthritis                                                         | 40 | 15 | -0.3 (-1-0.1)    | 0.18         | 0.03 (-0.5-1)     | 0.92         | 0.06 (-0.02-0.1)      | 0.18             | <b>44 (12-77)</b> | <b>0.007</b> |
| Osteoporosis with fracture                                                             | 23 | 9  | 0.02 (-0.5-1)    | 0.92         | 0.03 (-1-1)       | 0.92         | -0.02 (-0.1-0.09)     | 0.76             | -16 (-58-26)      | 0.46         |
| Avascular necrosis                                                                     | 7  | 3  | 0.04 (-1-1)      | 0.93         | -0.3 (-2-1)       | 0.58         | 0.007 (-0.2-0.2)      | 0.94             | -37 (-115-41)     | 0.36         |
| Osteomyelitis                                                                          | 1  | 0  | 0.4 (-2-3)       | 0.70         | 2 (-1-5)          | 0.18         | -0.08 (-1-0.4)        | 0.73             | -119 (-308-70)    | 0.22         |
| Tendon rupture                                                                         | 4  | 2  | -0.1 (-1-1)      | 0.86         | -0.2 (-2-1)       | 0.84         | 0.06 (-0.2-0.3)       | 0.58             | 51 (-44-146)      | 0.29         |
| <i>Points =&gt;1 in the domain</i>                                                     | 89 | 31 | 0.002 (-0.3-0.3) | 0.99         | 0.2 (-0.2-1)      | 0.41         | 0.03 (-0.03-0.09)     | 0.36             | 18 (-7-43)        | 0.17         |
| Skin                                                                                   |    |    |                  |              |                   |              |                       |                  |                   |              |
| Scarring chronic alopecia                                                              | 16 | 6  | 0.1 (-1-1)       | 0.78         | -0.2 (-1-1)       | 0.72         | -0.02 (-0.1-0.1)      | 0.77             | -32 (-86-22)      | 0.24         |
| Extensive scarring or panniculitis                                                     | 10 | 4  | 1 (-0.1-1)       | 0.094        | 0.3 (-1-1)        | 0.60         | <b>0.2 (0.05-0.4)</b> | <b>0.010</b>     | 41 (-25-108)      | 0.22         |
| Skin ulceration                                                                        | 4  | 1  | 0.4 (-1-2)       | 0.47         | 0.1 (-1-2)        | 0.86         | 0.2 (-0.06-0.4)       | 0.15             | -5 (-104-94)      | 0.93         |
| <i>Points =&gt;1 in the domain</i>                                                     | 39 | 14 | 0.03 (-0.4-0.4)  | 0.88         | -0.3 (-1-0.2)     | 0.24         | 0.05 (-0.03-0.1)      | 0.22             | -16 (-50-19)      | 0.38         |
| Premature gonadal failure                                                              | 19 | 7  | -0.02 (-1-1)     | 0.94         | 0.05 (-1-1)       | 0.90         | -0.02 (-0.1-0.1)      | 0.79             | 5 (-45-56)        | 0.83         |
| Diabetes (regardless of treatment)                                                     | 18 | 6  | 0.003 (-1-1)     | 0.99         | -0.3 (-1-0.5)     | 0.42         | -0.09 (-0.2-0.03)     | 0.14             | -40 (-90-10)      | 0.11         |
| Malignancy (exclude dysplasia)                                                         | 11 | 4  | -1 (-1-0.2)      | 0.14         | -1 (-2-0.2)       | 0.13         | -0.1 (-0.3-0.01)      | 0.066            | -18 (-84-48)      | 0.60         |

SLICC items and domains represent the independent variable. Significant p values are depicted in bold.

SLICC: Systemic Lupus International Collaborating Clinics/American Colleague of Rheumatology Damage Index.

SIRI: systemic inflammation response index; NLR: neutrophil-to-lymphocyte ratio; PLR: platelet-to-lymphocyte ratio; MLR: monocyte-to-lymphocyte ratio.
